# Supplementary material for: Diversity in Fruit Morphology and Nutritional Composition of Juglans mandshurica Maxim in Northeast China
Source: Front Plant Sci. 2022 Feb 10;13:820457. doi: 10.3389/fpls.2022.820457 (PMC8866725; doi:10.3389/fpls.2022.820457)
Supplement: Supplementary file 3 [file Table_2.XLSX]

## Sheet: Sheet1
Table S2. Fruit morphology for individual population
Population	Fruit length (mm)						Fruit width (mm)						Index of fruit shape						Fruit weight (g)						Nut vertical diameter (mm)						Nut tansverse diameter (mm)						Nut lateral diameter (mm)						Mean diameter (mm)						Index of roundness
	Mean	Duncan*	Max	Min	SD	CV(%)	Mean	Duncan	Max	Min	SD	CV(%)	Mean	Duncan	Max	Min	SD	CV(%)	Mean	Duncan	Max	Min	SD	CV(%)	Mean	Duncan	Max	Min	SD	CV(%)	Mean	Duncan	Max	Min	SD	CV(%)	Mean	Duncan	Max	Min	SD	CV(%)	Mean	Duncan	Max	Min	SD	CV(%)	Mean
BX	52.9752	d	67.47	36.52	5.60575	10.5818	37.2705	c	47.6	26.25	3.24554	8.70807	1.42543	e	2.0089	1.06499	0.140537	9.85925	29.3111	c	47.091	18.011	6.7169	22.9159	42.925	c	58	27.46	5.18588	12.0813	27.1051	cd	34.94	14.79	2.75063	10.148	27.0517	de	36.13	20.95	2.41024	8.90977	32.2982	f	39.29	25.49	2.60345	8.06068	0.641003
DFH	54.1413	e	70.04	37.84	5.46272	10.0897	38.2504	ef	51.75	30.41	3.32779	8.70001	1.42173	e	2.05422	1.10232	0.159274	11.2028	29.0647	c	50.631	16.964	6.40158	22.0253	41.9436	b	55.87	29.48	4.27696	10.1969	27.3103	d	35.38	21.06	2.31958	8.49341	27.5299	fg	35.16	20.74	2.76461	10.0422	31.9421	de	39.7667	24.44	2.4089	7.54145	0.654017
DJC	54.76	f	67.52	41.96	5.01852	9.16457	38.165	e	47.92	29.3	3.1882	8.35373	1.43882	f	1.9602	1.14735	0.122663	8.52527	31.6194	d	55.285	18.754	7.15585	22.6312	43.9464	e	57.06	31.6	5.27117	11.9945	27.0275	c	36.95	18.98	3.23086	11.954	26.2287	c	32.65	19.46	2.50811	9.56245	31.6873	cd	37.98	24.74	2.93953	9.27671	0.615303
HC	48.0574	a	59.91	39.51	3.60674	7.50507	34.8923	a	41.62	25.1	3.15651	9.04644	1.38697	b	1.88682	1.03688	0.147308	10.6208	23.8095	a	33.65	15.413	4.27421	17.9517	37.8876	a	47.11	29.81	3.10172	8.18665	24.9476	a	29.53	20.35	1.79683	7.20242	24.7559	a	30.97	21.04	1.91573	7.73849	29.197	a	33.27	24.7933	1.82095	6.23676	0.658704
HL	52.3605	c	67.53	40.76	5.22136	9.97194	38.7771	g	48.2	27.73	3.30036	8.51111	1.3561	a	1.83736	1.06583	0.144381	10.6468	31.4405	d	46.168	19.61	5.28906	16.8224	41.9569	b	54.56	32.45	4.17225	9.94413	27.3279	d	34.4	21.67	2.33921	8.5598	27.6152	g	35.28	21.3	2.35048	8.51155	32.0685	ef	38.3733	25.64	2.38285	7.43051	0.654009
JST	51.9248	bc	64.04	42.84	3.65925	7.04721	38.3522	ef	45.83	30.68	2.68058	6.98938	1.35774	a	1.70501	1.06806	0.102588	7.5558	33.5909	e	47.921	23.582	4.87203	14.504	42.1648	b	50.09	34	3.29947	7.82518	26.8862	bc	32.06	21.33	1.98021	7.36517	25.6591	b	31.06	20.83	2.13832	8.3336	31.0775	b	36.04	26.5867	1.80286	5.80118	0.62728
JY	53.3185	d	67.07	35.97	4.28883	8.04379	37.6723	d	46.73	27.34	2.89581	7.68684	1.42004	e	2.0098	1.01754	0.120888	8.51303	29.5354	c	40.945	20.2	4.69547	15.8978	43.4047	d	52.99	33.47	3.74047	8.61766	27.7903	e	32.64	23.85	1.63407	5.88002	28.4029	h	35.68	23.19	2.27138	7.99701	33.317	h	38.5367	28.6333	1.97665	5.93286	0.64697
LJ	51.4906	b	67.21	38.71	4.79905	9.32024	36.5243	b	45.03	28.37	2.80044	7.66733	1.41453	de	1.94314	1.05551	0.137602	9.72774	27.1193	b	42.969	15.345	5.24055	19.3241	42.7174	c	55.49	32.11	4.3862	10.268	26.6851	b	33.93	21.3	2.17471	8.14954	26.7853	d	33.79	21.88	2.44381	9.1237	31.6337	c	38.08	25.7333	2.47881	7.83596	0.634509
SC	53.3431	d	69.22	38.59	5.8702	11.0046	38.5543	fg	49.18	30.22	3.63366	9.42479	1.38744	b	1.79112	0.943353	0.131297	9.4633	33.2632	de	52.612	17.366	8.15066	24.5036	44.1595	ef	55.51	31.363	5.42387	12.2824	27.6374	e	34.72	23.18	2.44878	8.86038	28.2281	h	38.76	22.14	3.54259	12.5498	32.9356	g	39.57	26.9333	3.00161	9.11358	0.648076
TL	54.8382	f	71.15	39.75	4.91234	8.95788	39.5573	h	46.66	30.7	2.79914	7.07617	1.39098	bc	1.96331	1.0334	0.139001	9.99298	35.6533	f	50.411	23.901	6.07136	17.0289	44.0056	e	55.8	28.56	4.76462	10.8273	27.5935	e	34.87	17.13	3.03311	10.9921	27.2257	ef	35.81	17.34	2.94707	10.8246	32.9676	g	38.3667	25.09	2.6633	8.07854	0.613268
WC	52.2862	c	66.08	38.41	4.52997	8.6638	37.7866	d	49.41	26.42	3.56012	9.42165	1.39271	bc	1.95948	1.04194	0.149181	10.7115	32.825	de	47.043	16.913	5.9996	18.2776	42.9593	cd	53.84	30.99	3.71264	8.64222	28.4158	f	35.89	21.2	2.80112	9.85761	27.2303	ef	33.56	21.04	2.20969	8.11481	32.6914	g	37.51	26.9033	2.11632	6.47364	0.639429
YBL	54.9136	f	68.1	43.92	4.97266	9.05543	39.2809	h	46.8	30.01	3.26365	8.30849	1.40235	cd	1.83147	1.09908	0.120889	8.62046	32.7435	de	46.952	21.592	7.14151	21.8105	44.5153	f	58.29	31.73	4.5942	10.3205	28.2744	f	36.26	18.3	2.34813	8.30481	28.4973	h	34.47	23.12	2.16229	7.5877	33.5429	h	40.7133	28.7767	2.26068	6.73966	0.645224
All	52.9846		71.15	35.97	5.18723	9.79007	38.0013		51.75	25.1	3.3626	8.84864	1.39972		2.05422	0.943353	0.137336	9.81166	31.0593		55.285	15.345	6.83232	21.9977	42.8501		58.29	27.46	4.67798	10.9171	27.3071		36.95	14.79	2.59611	9.50708	27.0948		38.76	17.34	2.72516	10.0579	32.1073		40.7133	24.44	2.652	8.25981	0.639747
* different letters indicate statistical significance
[truncated: 29 more columns]
