# Supplementary material for: Diversity in Fruit Morphology and Nutritional Composition of Juglans mandshurica Maxim in Northeast China
Source: Front Plant Sci. 2022 Feb 10;13:820457. doi: 10.3389/fpls.2022.820457 (PMC8866725; doi:10.3389/fpls.2022.820457)
Supplement: Supplementary file 4 [file Table_3.DOCX]

**Table S3.** Inter- and intra-group variations of fruit morphology of 12 *J. mandshurica* populations

| **Fruit morphology** | **Variance（df）** | | | **F values** | |
| --- | --- | --- | --- | --- | --- |
| **Inter-group** | **Intra-group** | **Random error** | **Inter-group** | **Intra- group** |
| Fruit length | 2476.441（11） | 535.189（324） | 6.346（9317） | 390.218** | 84.331** |
| Fruit width | 1117.114（11） | 210.064（324） | 3.084（9317） | 362.253** | 68.119** |
| Index of fruit shape | 0.537（11） | 0.373（324） | 0.006（9317） | 90.59** | 63.024** |
| Fruit weight | 999.813（11） | 140.297（324） | 2.547（927） | 392.487** | 55.075** |
| Nut vertical diameter | 1816.411（11） | 439.199（321） | 4.067（8648） | 446.597** | 107.985** |
| Nut transverse diameter | 479.785（11） | 141.196（321） | 1.117（8648） | 429.527** | 126.405** |
| Nut lateral diameter | 616.457（11） | 143.601（228） | 1.155（6100） | 533.744** | 124.333** |
| Mean diameter | 706.863（11） | 133.747（228） | 0.989（6100） | 715.08** | 135.302** |
| Index of roundness | 0.11（11） | 0.096（228） | 0.001（6100） | 121.248** | 105.866** |
| Shell thickness | 65.199（11） | 6.338（237） | 0.178（5499） | 367.206** | 35.698** |
| Nut weight | 287.919（11） | 51.049（237） | 0.665（5499） | 432.668** | 76.714** |
| Kernel weight | 8.187（11） | 1.835（237） | 0.035（5499） | 235.13** | 52.717** |
| Kernel rate | 0.055（11） | 0.011（237） | 0.0002（5499） | 283.896** | 55.145** |

*: p < 0.05; **: p < 0.01.
